# Supplementary material for: Pioglitazone reduces cardiovascular events and dementia but increases bone fracture in elderly patients with type 2 diabetes mellitus: a national cohort study
Source: publisher site journal article supplement (doi:10.18632/aging.204643), 2023-04-07
Supplement: Supplementary file [file aging-v15i7-204643-supplementary-material-SD1.pdf]

## SUPPLEMENTARY TABLE

**Supplementary Table 1. Disease or procedure codes for outcomes in this study.**

| <b>Disease</b>                                    | <b>ICD-9-CM</b>                                | <b>ICD-10-CM</b>                                                                                                                       |
|---------------------------------------------------|------------------------------------------------|----------------------------------------------------------------------------------------------------------------------------------------|
| CABG                                              | 68023A, 68023B, 68024A, 68024B, 68025A, 68025B | 02100, 02110, 02120, 02130                                                                                                             |
| AMI                                               | 410                                            | I21, I22                                                                                                                               |
| PCI                                               | 33076A, 33076B, 33077A, 33077B, 33078A, 33078B | 02103, 02104, 02113, 02114, 02123, 02124, 02133, 02134                                                                                 |
| Stroke                                            | 430-437                                        | I60-64, G45.0, G45.1, G45.4, G45.8, I67                                                                                                |
| Heart failure                                     | 428                                            | I50                                                                                                                                    |
| Dementia                                          | 290.0-290.4, 294.1, 331.0, 331.1-331.2         | F00-F03                                                                                                                                |
| Non-traumatic bone fracture                       | 733.1, 805-829, exclude E810-E819              | M484, M495, M80, M843-844, M907, M966, S02, S12, S22, S32, S42, S52, S62, S72, S82, S92, T02, T08, T10, T12, T142<br>Exclude E810-E819 |
| <b>Infection</b>                                  |                                                |                                                                                                                                        |
| Sepsis                                            | 038, 995.91, 995.92, 020.2, 785.52, 790.7      | R65.20, R65.21, R78.81, A41.9, A49.9, B96.89                                                                                           |
| Pneumonia                                         | 481-486 (exclude 484)                          | J14, J15, J16, J17, J18, J12, J69, J95.8, J09, M96, B25.0, B96.1, B95.3, B37.1, B38.0, A74, A40.3, A02.22, B45.0, B44.9, O89.01        |
| Empyema                                           | 510.0, 510.9                                   | J85, J86                                                                                                                               |
| Cellulitis                                        | 681, 682                                       | L03, H60, H05, H00, K61                                                                                                                |
| Necrotizing fasciitis                             | 728.86                                         | M72.6                                                                                                                                  |
| Urinary tract infection                           | 590, 595.0, 599.0                              | N39.0, N30.01, N30.90, N99.51x, B37.41, A54.01, A56.01, N10.xx, N11.xx, N12.xx, N15.xx, N16.xx, T83.511                                |
| Biliary tract infection                           | 576.1, 575.0, 574.00                           | K83                                                                                                                                    |
| Brain abscess                                     | 324                                            | G06, A54.82, B43.1, A06.6                                                                                                              |
| Liver abscess                                     | 572.0                                          | K75                                                                                                                                    |
| Perianal abscess                                  | 566                                            | K61                                                                                                                                    |
| Bacterial meningitis                              | 320                                            | G03                                                                                                                                    |
| Septic arthritis                                  | 711                                            | M00, M19.90                                                                                                                            |
| Infection of catheter, device, implant, and graft | 996.6, 999.3                                   | T80.2, T82.7, T85.7, T83.51,                                                                                                           |
| Peritoneal and retroperitoneal infection          | 567                                            | K65, K67, A18.31, T85.71, N73, K68.11                                                                                                  |
| Osteomyelitis                                     | 730.3, 730.8, 730.9                            | M86, M46.2-M46.5                                                                                                                       |
| Infective endocarditis                            | 421                                            | I33, I38                                                                                                                               |

Abbreviations: AMI: acute myocardial infarction; CABG: coronary artery bypass graft; PCI: percutaneous coronary intervention.
